---

# Neuronal responses to focused ultrasound are gated by pre-stimulation brain rhythms

---

## *Authors:*

Duc NGUYEN

Department of Biomedical Engineering  
City College of New York

Elisa KONOFAGOU

Department of Biomedical Engineering  
Columbia University

Jacek P. DMOCHOWSKI\*

Department of Biomedical Engineering  
City College of New York

\*Correspondence address:

Jacek P Dmochowski

160 Convent Avenue

New York NY 10031

[jdmochowski@ccny.cuny.edu](mailto:jdmochowski@ccny.cuny.edu)

# Neuronal responses to focused ultrasound are gated by pre-stimulation brain rhythms

## Abstract

*Background:* Owing to its high spatial resolution and penetration depth, transcranial focused ultrasound stimulation (tFUS) is one of the most promising approaches to non-invasive neuromodulation. Identifying the impact of the stimulation waveform and endogenous neural activity on neuromodulation outcome is critical to harnessing the potential of tFUS.

*Objective:* Here we tested a new form of tFUS where the amplitude of the ultrasonic waveform is modulated at a rate much slower than the operating frequency. Moreover, we sought to identify the relationship between pre-stimulation neural activity and the neuronal response to tFUS.

*Methods:* We applied three minutes of amplitude modulated (AM) tFUS at 40 Hz to the rat hippocampus while recording local field potentials (LFP) and multi-unit activity (MUA) from the sonicated region. To assess the role of AM, we also tested continuous-wave (CW) stimulation.

*Results:* AM tFUS reduced firing rate during and immediately after stimulation. On the other hand, CW tFUS produced an acute firing rate increase that was abolished after sonication. For both waveforms, firing rate changes were stronger in units exhibiting high baseline LFP power, particularly in the gamma band (30-250 Hz). The neuromodulatory effect was also influenced by the prevalence of sharp wave ripples (SWR) during the pre-stimulation period, with firing rates modulated by up to 33% at units showing frequent baseline SWR.

*Conclusion:* Our findings suggest that AM and CW tFUS produce qualitatively different neuronal outcomes, and that baseline rhythms may effectively “gate” the response to tFUS.

**Keywords**— ultrasonic neuromodulation, focused ultrasound stimulation, transcranial focused ultrasound stimulation, non-invasive brain stimulation

## Introduction

Historically employed to image soft tissue, low-intensity focused ultrasound has more recently been shown to modulate brain activity (1; 2; 3; 4) in models spanning cell cultures (5; 6; 7), rodents (8; 9; 10; 11; 12; 13; 14; 15), primates (16; 17; 18; 19; 20), and humans (21; 22; 23; 24; 25; 26; 27; 28; 29; 30). Ultrasound overcomes the critical limitations of conventional (electromagnetic) non-invasive brain stimulation: it can be focused through the skull with millimeter precision (31) and penetrate deep brain regions (21). This raises the tantalizing possibility of utilizing transcranial

30 focused ultrasound stimulation (tFUS) to modulate mesoscale neural circuits without the need  
31 for surgery, potentially providing novel interventions for the host of neurological and psychiatric  
32 disorders associated with aberrant brain activity (32).

33 To date, two general paradigms have been proposed for ultrasonic neuromodulation:  
34 continuous-wave (CW) and pulsed-wave (PW) tFUS. CW tFUS consists of a constant ampli-  
35 tude sinusoid, while PW tFUS is delivered as a series of tone bursts with a fixed duty cycle (33).  
36 In both cases, the sonication duration is generally short, most often in the tens to hundreds of  
37 milliseconds (2), although longer sonications have been found to yield long-lasting effects (16; 34;  
38 10). There is not yet a clear consensus as to the relative efficacy of CW versus PW tFUS, with some  
39 studies finding that PW is able to elicit neuromodulation at lower intensities than CW (35), while  
40 others have reported a greater efficacy with CW tFUS (36). Given that the specificity of tFUS may  
41 originate from tailoring the ultrasonic dose (37) (i.e., frequency, intensity, duration, waveform), the  
42 identification of novel paradigms for ultrasonic neuromodulation is important to the advancement of  
43 tFUS as an intervention for disorders of the central nervous system.

44 Substantial variability in neural and behavioral outcomes has been widely reported in non-  
45 invasive brain stimulation (38; 39; 40), including focused ultrasound (28). Identifying the sources of  
46 this variability, whether it be exogenous (i.e., positioning of the transducer, anatomical differences)  
47 or endogenous (i.e., baseline neurophysiology) is essential to achieving robust and predictable  
48 outcomes with tFUS. The dynamics of the sonicated region leading up to stimulation, especially  
49 neural oscillations, may exert a causal influence on the subsequent response to stimulation (41).  
50 Electrophysiological brain rhythms may be readily captured with the electroencephalogram (EEG)  
51 or local field potentials (LFP). To our knowledge, however, the influence of baseline brain state on  
52 neuronal response to ultrasonic neuromodulation has not yet been investigated.

53 Here we propose and test a new mode of tFUS employing amplitude modulation (AM).

## Oscillations gate tFUS outcomes

---

54 Originating from telecommunications, AM is a signaling approach where the amplitude of a fast  
55 “carrier” wave is sinusoidally modulated at a relatively slow rate. In the context of tFUS, AM  
56 allows the embedding of a low frequency (analogous to the pulse repetition frequency in PW tFUS)  
57 into the ultrasonic stimulus, but in a smooth manner that avoids abrupt pressure transitions that  
58 may yield undesired effects during stimulation (15). To evaluate the effect of the proposed AM  
59 tFUS on neuronal activity, we stimulated the rat hippocampus while simultaneously recording  
60 electrophysiological responses from the sonicated region. We conditioned the resulting changes  
61 in spiking on baseline population activity, considering both the power of oscillations in canonical  
62 frequency bands as well as stereotyped markers of hippocampal excitability, namely sharp wave  
63 ripples (SWR) (42).

64 We found opposing effects on neuronal spiking with AM versus CW tFUS: multi-unit activity  
65 (MUA) was reduced with AM stimulation, while increasing with CW tFUS. Importantly, we also  
66 found a significant relationship between the power of endogenous brain rhythms prior to stimulation  
67 and the subsequent change in spiking. For both AM and CW stimulation, the firing rate change  
68 produced by tFUS was significantly larger when the pre-stimulation power of LFP oscillations was  
69 high, particularly in the gamma (30-250 Hz) band. Similarly, units with a high prevalence of baseline  
70 SWR responded more strongly to tFUS. Our findings suggest that AM tFUS represents a distinct  
71 paradigm for tFUS that may be well-suited to applications requiring the reduction of activity. More  
72 generally, the results underscore the importance of brain state in shaping the outcome of ultrasonic  
73 neuromodulation.

## 74 **Materials and Methods**

75 Data were obtained from 18 adult male Long Evans rats weighing at least 350g ( $426.0 \pm 32.2$ g,  
76 mean  $\pm$  sd). All experimental procedures were approved by the Institutional Animal Care and Use  
77 Committee of the City College of New York, City University of New York.

78 **Transcranial focused ultrasound stimulation.** In  $n = 8$  rats, AM (40 Hz AM frequency, 100%  
79 AM depth, carrier frequency 2.0 MHz, sinusoidal) and CW waveforms (carrier frequency 2.0 MHz,  
80 sinusoidal) were generated with a waveform generator (Keysight 33500B Series). The output of  
81 the waveform generator was fed into the input of an RF Amplifier (Electronics and Innovation,  
82 40W). The amplifier provided the drive voltage into a single-element ultrasonic transducer (Ultran  
83 KS25-2 immersion transducer, 2 MHz, 6.25 mm active diameter). Empirical measurements in a  
84 watertank indicated that the beampattern of this transducer has a full-width-half max (FWHM)  
85 of 2.4 mm laterally and 10 mm in depth. In the remaining  $n = 10$  rats, AM tFUS (40 Hz AM  
86 frequency, 100% AM depth, carrier frequency 2.5MHz, sinusoidal) and CW tFUS (carrier frequency  
87 2.5 MHz, sinusoidal) was delivered with an integrated FUS system (Sonic Concepts TPO-201)  
88 feeding a dual-channel, axial steered ultrasonic transducer (Sonic Concepts SU-132, 9.625 mm  
89 active diameter). The FWHM of this transducer was empirically measured as 1 mm lateral and 1.5  
90 mm in depth (see Fig 1A). In all experiments, the transducer was mounted onto a micromanipulator  
91 arm of a stereotaxic frame (David Kopf Instruments) and coupled to the rat skull with ultrasonic  
92 coupling gel. The transducer was positioned over the desired anatomical target with the transducer  
93 face parallel to the skull (active stimulation: the right hippocampus -3.5 mm AP, +2.5 mm ML,  
94 targeted depth of 3.5 mm; sham stimulation: the left olfactory bulb +6 mm AP, +1.5 ML, targeted  
95 depth of 3.5 mm, coordinates relative to skull bregma and midline).

96 **Experimental design.** A within-subjects design was employed where each animal received all  
97 eight experimental conditions, which spanned all combinations of two intensity values (13 mW/cm<sup>2</sup>  
98 and 52 mW/cm<sup>2</sup>), two waveforms (40 Hz AM and CW), and the two stimulation types (active and  
99 sham). The condition ordering was counterbalanced throughout the cohort to control for any order  
100 effects. A 50 minute interval was added between each condition to allow any outlasting effects to  
101 dissipate.

102 **Acoustic intensity calibration.** Ultrasonic pressures were measured in a water tank with a  
103 calibrated hydrophone (Onda Corporation). Pressures were determined in both free field as well  
104 as with a model rat skull placed between the transducer and hydrophone. The values reported in  
105 the *Results* correspond to the intensities with the skull present. From the water tank calibrations, it  
106 was determined that the skull attenuates the acoustic pressure to a value that is 2/3 of the free-field  
107 pressure. For each transducer, the drive voltage required to produce acoustic intensities of 13  
108 mW/cm<sup>2</sup> and 52 mW/cm<sup>2</sup> were determined and employed in the experiments. The pressure  
109 corresponding to 13 mW/cm<sup>2</sup> was 14 kPa, with an associated mechanical index (MI) of 0.01 at a 2  
110 MHz center frequency. The pressure corresponding to 52 mW/cm<sup>2</sup> was 28 kPa, with an associated  
111 mechanical index of 0.02.

112 **Anesthesia and surgery.** Prior to surgical experimentation, selected animals weighing at least 350g  
113 were fasted for 12-14 hours to increase urethane absorption. On the day of surgical experimentation,  
114 animals were placed into an induction chamber and induced with gaseous isoflurane at 3% (L/min).  
115 Animals were removed from the induction chamber and a nose cone was attached so that the dorsal  
116 hair could be shaved in preparation for the craniotomy. Animals were then placed on a stereotaxic  
117 frame (David Kopf Instruments) with earbars securing the head. The isoflurane concentration was  
118 then reduced to 2% (L/min). A cross incision was performed over the dorsal skull to expose the

119 cranium and skull landmarks. The distance from bregma to the interaural line was measured so  
120 that AP coordinates could be adjusted to account for differences in animal size. The center of the  
121 forthcoming craniotomy was marked at -7.5 AP and +2.5 ML (directly posterior of the placement  
122 for active stimulation). This allowed sufficient clearance between the edge of the transducer and  
123 the border of the craniotomy. A 2 mm by 2 mm craniotomy was performed over the marked  
124 area, followed by the removal of the dura. A small titanium screw was implanted into the skull  
125 (left hemisphere) to provide an electrical ground for the electrophysiological recordings. The  
126 concentration of isoflurane was further reduced to 1% (L/min) and a urethane cocktail (1.5g/kg  
127 diluted with 2.5ml/g saline, divided into 3-4 doses with one dose administered every 10 minutes)  
128 was administered via intraperitoneal injection. After the final urethane injection, isoflurane was  
129 again lowered to 0.5% (L/min) to allow for urethane absorption and anesthesia transition. After 30  
130 minutes, isoflurane was discontinued and a 120 minute period was allowed for complete expulsion  
131 of isoflurane and to achieve a stable anesthesia plane prior to the experiment.

132 **Electrophysiology.** Multi-unit activity (MUA) and local field potentials (LFP) were recorded with  
133 a linear 32-channel silicon electrode array (NeuroNexus A32, 100  $\mu\text{m}$  spacing between adjacent  
134 contacts). Signals were recorded with a digital acquisition system (NeuroNexus SmartBox) at a  
135 sampling rate of 30 kHz. The probe was placed into the center of the craniotomy at an angle of  
136 53° from vertical (angled towards the posterior), and then advanced 6 mm so that the contacts  
137 sampled multiple subregions of the hippocampal formation, including CA1, CA3, and the dentate  
138 gyrus. Electrophysiological recording commenced two minutes before the onset of ultrasonic  
139 stimulation, continued throughout the three-minute stimulation period as well as an additional five  
140 minutes post-stimulation, resulting in 10 minute data recordings for each experimental condition. A  
141 continuous trigger was outputted from either the waveform generator or integrated FUS system to

142 the digital acquisition system throughout ultrasonic stimulation to mark tFUS onset.

143 **MUA analysis.** We employed the Kilosort 2 (43) software running on Matlab (Mathworks, Release  
144 2019a) to perform automated spike detection and sorting. This technique forms a generative model  
145 of the extracellular voltage, learns a spatiotemporal template of each spike waveform based on  
146 the singular value decomposition, and employs multiple passes through the data to yield clusters  
147 of spikes. We employed most default parameters provided by the developers, as described in the  
148 standard configuration file provided at [github.com/MouseLand/Kilosort](https://github.com/MouseLand/Kilosort). We employed a high  
149 pass filter cutoff of 400 Hz to exclude slow activity, lowered the detection threshold from -6  
150 to -5 standard deviations, and doubled the default batch size to improve the learning algorithm  
151 for the spatiotemporal template. Spike detection and sorting was performed separately for each  
152 animal, and all 8 experimental recordings were chronologically assembled into a single data record  
153 prior to processing. The results of the automated procedure were imported into the Phy software  
154 (44), an open source Python library and graphic user interface for manual curation of large-scale  
155 electrophysiological data. Visual inspection of each identified unit's auto- and cross-correlograms,  
156 distribution of amplitudes, and spike waveforms was performed to discard units deemed to be  
157 non-biological ( $n = 196$  units were discarded). The analysis led to a total of  $n = 392$  units whose  
158 firing rates were then probed for changes due to the tFUS intervention.

159 **LFP analysis.** LFP signals were analyzed offline using custom Matlab scripts (Mathworks, Release  
160 2019a). Data was bandpass filtered to the 1-250 Hz band with a second-order Butterworth filter  
161 and then downsampled to 500 Hz. A series of notch filters were then applied to remove 60 Hz  
162 noise and its first four harmonics. Robust principal components analysis (robust PCA) (45) was  
163 employed to remove gross artifacts by decomposing the observed data matrix into low-rank and  
164 sparse components. Due to the smoothness of volume conducted signals, the sparse component is



165 expected to be artifactual and was thus removed from the data. Data were then transformed into  
166 the frequency domain by performing Thomson multi-taper spectral analysis with a time-bandwidth  
167 product of 4. All spectra were normalized by the total spectral power measured in the pre-stimulation  
168 period of each animal's first condition to account for varying power levels between animals. Spectra  
169 were further resampled in the frequency domain to 1000 samples between 1 and 250 Hz via  
170 linear interpolation. Spectral powers for any frequency greater than 57 and less than 63 hz were  
171 marked as missing data due to possible contamination from line noise. Spectral powers were then  
172 logarithmically transformed, averaged across contacts within the hippocampus (two contacts outside  
173 of the hippocampus were excluded), and then averaged across the appropriate segment of time  
174 (baseline, stimulation, post-stimulation). The dependent variable was formed as the difference  
175 in LFP power between the stimulation (or post-stimulation) and baseline segments, measured  
176 frequency-wise.

177 **Baseline LFP measurement.** In order to investigate the role of baseline brain state on neuromod-  
178 ulation outcome, we computed the the mean power in the following frequency regions: delta (1-3  
179 Hz), low theta (4-6 Hz), high theta (6-10 Hz), and gamma (30-250 Hz). For each MUA unit, we  
180 determined the electrode contact best expressing the spikes by searching for the channel with largest  
181 spike amplitude. We then measured the logarithmically transformed LFP power during the two  
182 minute pre-stimulation period at the identified contact. This formed the independent variable whose  
183 influence on firing rate changes were probed throughout the main text. When delineating “low” and  
184 “high” baseline LFP power, we partitioned the units into two groups with assignment based on the  
185 LFP power relative to the median power across all units. This assignment was performed separately  
186 for each frequency band.

187 **Sharp wave ripple detection.** In order to measure the prevalence of sharp wave ripples (SWRs)  
188 during the pre-stimulation period, we followed the detection algorithm described previously by  
189 Levenstein et al (46). Sharp waves were detected when the power of the contact-averaged LFP in  
190 the 2-50 Hz band exceeded 2.5 standard deviations of the mean power. Only segments exceeding 20  
191 ms were retained. Ripples were detected when the contact-averaged LFP power in the 80-249 Hz  
192 band exceeded 2.5 standard deviations of the mean power, with a minimum segment length of 25  
193 ms. Samples that passed both the sharp wave and ripple detectors were then designated as SWRs.  
194 The proportion of time “spent” in SWR then served as the independent variable in the subsequent  
195 analysis of the gating of firing rate by the prevalence of SWR. In order to define periods of rare and  
196 frequent SWR, we performed a median split on the percentage of samples passing the SWR detector.  
197 Units that did not show any SWRs were excluded from the analysis. This resulted in a sample size  
198 of  $n = 189$  to  $n = 270$  units, depending on the condition.

199 **Statistical Testing.** Unless otherwise specified, testing for statistical significance was carried out  
200 by comparing the dependent variable measured under active stimulation against that observed with  
201 sham stimulation. When testing for significant differences in firing rates, we employed paired t-tests.  
202 Where appropriate, correction for multiple comparisons was conducted by controlling the false  
203 discovery rate (FDR) at 0.05. When probing significant discrimination of firing rate change by  
204 the baseline LFP power (Fig 4), we performed a non-parametric test scrambling the assignment of  
205 non-responders (firing rate change less than the median) and responders (firing rate change greater  
206 than the median). A total of 1000 mock data records modeling the null distribution of AUROC were  
207 then employed to test for significance of the true AUROC at each frequency (corrected for 2049  
208 comparisons using the FDR). When probing tFUS-induced changes to the LFP power spectrum  
209 during and after stimulation, a non-parametric test scrambling the assignment of active and sham

210 conditions was employed, with 1000 permutations employed to estimate the null distribution of LFP  
211 power spectral changes at each frequency. Cluster correction (47) was then employed to correct for  
212 multiple comparisons.

## 213 **Results**

214 In order to determine the effects of AM tFUS on hippocampal neuron spiking, as well as its  
215 relationship to baseline neural activity, we recorded multi-unit activity (MUA) and local field  
216 potentials (LFP) from the rat hippocampus before, during, and after the application of 180 s of tFUS  
217 at two different intensities ( $I_{\text{spta}}=13 \text{ mW/cm}^2$ ,  $I_{\text{spta}}=52 \text{ mW/cm}^2$ ) and two waveforms (40 Hz AM,  
218 CW). The empirical beampattern of a transducer employed during the experiments is depicted in Fig  
219 1A, where the lateral and axial full-width-half max (FWHM) are 1 and 1.5 mm, respectively. Each  
220 of the four doses was paired with a corresponding sham condition during which we stimulated the  
221 contralateral olfactory bulb to account for non-specific effects such as spontaneous activity changes  
222 and potential bone conduction of the ultrasonic stimulus. The order of all eight conditions was  
223 counterbalanced across the  $N = 18$  animals tested. Semi-automated spike sorting identified a total  
224 of  $n = 392$  MUA units. The primary outcome measure was the change in firing rate observed during  
225 tFUS relative to the baseline period (Fig 1B). We then related the observed changes in spiking rate  
226 to several LFP-derived markers of brain state, such as the power of oscillations and prevalence of  
227 sharp-wave ripples (SWRs) during the pre-stimulation period.

228 **AM and CW produce opposing effects on firing rate.** We found a significant reduction in  
229 firing rate during 13 mW AM tFUS (Fig 1C: active firing rate change =  $-0.22 \pm 0.087 \text{ Hz}$ , sham  
230 firing rate change =  $0.026 \pm 0.031 \text{ Hz}$ , means  $\pm$  sem,  $n = 392$  units from  $N = 18$  animals, paired  
231 t-test,  $p = 0.0093$ ). We also found a significant increase in firing rate during 52 mW CW tFUS

## Oscillations gate tFUS outcomes

232 (Fig 1F: active firing rate change =  $0.21 \pm 0.046$  Hz, sham firing rate change =  $-0.21 \pm 0.037$  Hz,  
233  $p = 1.38 \times 10^{-12}$ ). We were not able to resolve a significant change in firing rate during either  
234 13 mW CW tFUS (Fig 1D,  $p = 0.27$ ) or 52 mW AM tFUS (Fig 1E,  $p = 0.94$ ). To quantify the  
235 magnitude of the average firing rate changes observed during tFUS (approximately 0.2 Hz), we note  
236 that the mean baseline firing rate across all animals and conditions was 2.32 Hz, meaning that the  
237 effect of tFUS for both AM and CW waveforms was in the order of 10%.

238 In order to probe outlasting firing rate changes, we compared the mean firing rate observed  
239 prior to tFUS with that measured in the five-minute period immediately following stimulation.  
240 We found a marginal but significant effect of reduced firing rate for 13 mW AM tFUS (data not  
241 shown; active firing rate change =  $-0.17 \pm 0.036$  Hz, sham firing rate change =  $0.087 \pm 0.048$   
242 Hz,  $p = 0.040$ ). There were no significant differences in firing rate during the five-minute period  
243 following tFUS for 13 mW CW, 52 mW AM, and 52 mW CW tFUS (Fig S1B-D, all  $p > 0.18$ ).

244 To gain insight into the dynamics of the firing rate changes detected during tFUS, we  
245 measured spiking rate in a time-resolved manner, employing non-overlapping 15 second increments  
246 (Fig 2). We focused the analysis on the 13 mW AM and 52 mW CW doses, as these exhibited a  
247 significant change during stimulation when aggregating across time segments (Fig 1). For each 15  
248 second window, we measured firing rate and tested for significant deviations from the baseline rate  
249 (stimulation onset occurred at 120 s). Compared to sham stimulation (Fig 2B), 13 mW AM tFUS  
250 produced extensive periods of significantly reduced firing rate during and after stimulation, extending  
251 210 seconds into the post-sonication period (Fig 2C: significance during windows beginning at 120,  
252 165-225, 315-360, 390, 435 and 495 s; during tFUS:  $p < 0.016$ , after tFUS:  $p < 0.013$ , paired  
253 t-tests of the difference between time-resolved firing rate and the baseline firing rate,  $n = 392$ ,  
254 corrected for multiple comparisons by controlling the false discovery rate at 0.05). On the other  
255 hand, the increased firing rate observed during 52 mW CW tFUS was mostly confined to the

256 stimulation period (Fig 2F: significance during all windows between 120 and 315 s; during tFUS:  
257  $p < 1.8 \times 10^{-4}$ , after tFUS:  $p < 0.0055$ ). Interestingly, for both 13 mW AM and 52 mW CW, the  
258 peak acute effect occurred during the 180-195 s window (i.e., at the onset of the second minute of  
259 sonication), implying a slow accumulating effect. To that end, we probed short-term time-locked  
260 changes at tFUS onset and did not observe any significant effects (data not shown).

261 **tFUS neuromodulation is gated by baseline LFP power.** We suspected that the effect of tFUS  
262 on spiking is influenced by the state of the neuronal population prior to stimulation, in particular the  
263 level of synaptic activity. To test this hypothesis, we measured the LFP power spectrum during the  
264 two-minute baseline period leading up to stimulation for each unit, calculating the strength of neural  
265 oscillations at the contact that most strongly registered the spike (see *Methods*). We then sought to  
266 determine whether the units exhibiting high levels of pre-stimulation oscillations would respond  
267 more strongly to tFUS. To that end, we partitioned units into two groups, those exhibiting relatively  
268 low LFP power (less than median) and those exhibiting high power levels (greater than median). We  
269 performed this classification separately for the delta (1-3 Hz), low theta (4-6 Hz), high theta (6-10  
270 Hz), and gamma (30-250 Hz) frequency bands. If the LFP power modulates or “gates” the response  
271 to tFUS, we would expect the conditional distribution of firing rate to vary significantly between the  
272 two groups.

273 When considering all units, 13 mW AM tFUS reduced firing rate by an average of 0.22  
274 Hz (Fig 1C). These reductions were significantly amplified at units showing elevated power in  
275 all four frequency bands. For units exhibiting low delta power, the firing rate change was only  
276  $-0.040 \pm 0.11$  Hz; on the other hand, units whose delta power was above the median responded more  
277 prominently, with a firing rate change of  $-0.39 \pm 0.14$  Hz (Fig 3A,  $p = 0.043$ ,  $n = 196$ , unpaired  
278 t-test). Moreover, the trend of stronger firing rate changes held for 3-6 Hz theta (Fig 3C; low:

## Oscillations gate tFUS outcomes

279  $0.017 \pm 0.033$  Hz, high:  $-0.45 \pm 0.17$  Hz,  $p = 0.0077$ ), 6-10 Hz theta (Fig 3E: low:  $-0.0010 \pm 0.034$   
280 Hz, high:  $-0.43 \pm 0.17$  Hz,  $p = 0.014$ ), and gamma power (Fig 3G; low:  $-0.025 \pm 0.047$  Hz, high:  
281  $-0.41 \pm 0.17$  Hz,  $p = 0.029$ ). Note that, in all cases, the overall effect of 13 mW AM tFUS on firing  
282 rate was contributed by the units with high pre-stimulus power (i.e., an all-or-nothing phenomenon  
283 emerged, in that units with low oscillatory power did not experience any change).

284 A very similar finding was observed for 52 mW CW tFUS. In this condition, however, *low*  
285 delta power was associated with a more prominent response to tFUS:  $0.35 \pm 0.079$  Hz when the  
286 delta power was below the median, and only  $0.063 \pm 0.043$  Hz when the delta power was above the  
287 median (Fig 3B:  $p = 0.0013$ ). As was the case with 13 mW AM tFUS, high levels of 4-6 Hz theta  
288 (Fig 3D; low:  $0.053 \pm 0.050$  Hz, high:  $0.37 \pm 0.075$  Hz,  $p = 0.0005$ ), 6-10 Hz theta (Fig 3F; low:  
289  $0.12 \pm 0.047$  Hz, high:  $0.30 \pm 0.078$  Hz,  $p = 0.042$ ), and gamma (Fig 3H; low:  $0.077 \pm 0.044$  Hz,  
290 high:  $0.34 \pm 0.079$  Hz,  $p = 0.0037$ ) powers were associated with a significantly stronger response  
291 to tFUS.

292 In order to gain greater insight into the relationship between pre-stimulation rhythms and the  
293 subsequent response to tFUS, we visualized the empirical joint distribution between pre-stimulus  
294 LFP power (horizontal axis) and firing rate change (vertical axis) due to tFUS (left panels in Fig  
295 3). It became evident that units at the low end of the pre-stimulation power often exhibited no  
296 response. Moreover, the likelihood of a response generally increased as the baseline LFP power  
297 increased, with the firing rate change exhibiting a greater variance with increasing baseline LFP  
298 power. Note that this increased variance extended in both directions, in that some units exhibited  
299 a marked change in firing against the general trend (e.g. Fig 3E-F). These findings suggest that  
300 increased synaptic activity, as reflected in greater LFP power, signifies a higher general sensitivity  
301 to mechanical stimulation.

302 To identify the frequencies that are most predictive of successful neuromodulation, we

303 considered the prediction of firing rate change from the LFP power at each individual frequency.  
304 Given two distributions (i.e., LFP power for units with a strong response, LFP power for units with a  
305 weak response), the Receiver Operating Characteristic (ROC) curve provides a cumulative measure  
306 of the spread between the two distributions. For this analysis, we binarized the firing rate change  
307 by comparing each unit's change to the median, effectively partitioning the units into "responders"  
308 and "non-responders". Integrating the ROC curve yields an aggregated statistic termed the Area  
309 under the ROC curve (AUROC). Values near 0.5 signify no discrimination between distributions,  
310 while values closer to 0 or 1 denote that the predictor (i.e., LFP power) has a strong influence on the  
311 target (i.e., binarized firing rate change). For 13 mW AM tFUS, a significantly negative AUROC  
312 was observed in punctate regions of the delta and theta bands, as well as an extensive portion of the  
313 gamma frequencies (Fig 4A: significant frequencies indicated with markers above the horizontal  
314 axis, permutation test, corrected for multiple comparisons by controlling the false discovery rate at  
315 0.05). Given that AM tFUS decreased firing rate, a value of AUROC less than 0.5 signifies that  
316 units with high power in these bands responded with a more negative firing rate change. For 52 mW  
317 CW tFUS, a region of significant discrimination was found at very low frequencies (Fig 4B, trough  
318 near 2 Hz), in addition to a broad region of significance spanning frequencies from 3 to 140 Hz (Fig  
319 4B). This indicates that in CW tFUS, high LFP power in the theta and gamma region, as well as low  
320 delta power, promotes successful modulation of firing rate.

321 **tFUS neuromodulation is enhanced during periods of SWR.** Under conditions of urethane  
322 anesthesia and natural sleep, the hippocampus alternates between periods of spiking and inactivity.  
323 The active periods manifest in the LFP by sharp wave ripples (SWRs), short bursts of high-frequency  
324 activity (42; 46). Given that SWRs denote an excitable state, we suspected that tFUS would result  
325 in stronger responses when applied during periods of frequent SWR. To test this, we separated



326 units into two categories: those whose baseline periods exhibited fewer than the median number of  
327 observed SWRs, and those that showed more than the median.

328         When comparing the outcome of tFUS between the two groups, we found large effects for  
329 all tFUS conditions. With 13 mW AM tFUS, the firing rate reduction at units marked by frequent  
330 SWR was very pronounced:  $-1.11 \pm 0.32$  Hz, significantly larger than the change at units with  
331 rare baseline SWR:  $0.11 \pm 0.05$  Hz (Fig 5A;  $p = 2.58 \times 10^{-5}$ ,  $n_{\text{low}} = 169$ ,  $n_{\text{high}} = 101$ , unpaired  
332 t-test). The mean basal firing rate for units with prevalent SWR was  $3.34 \pm 0.40$  Hz, meaning that  
333 the spiking rate reduction for these units was approximately 33%. Interestingly, the influence of  
334 baseline SWR was also significant for 13 mW CW tFUS, with the frequent SWR state leading to a  
335 firing rate reduction of  $-0.28 \pm 0.10$  Hz and rare SWR leading to an increase of  $0.51 \pm 0.12$  Hz (Fig  
336 5B;  $p = 1.52 \times 10^{-6}$ ). For 52 mW AM tFUS, frequent baseline SWR led to a firing rate reduction  
337 of  $-0.35 \pm 0.079$  Hz, while units with few SWRs did not experience a modulation:  $0.021 \pm 0.030$   
338 Hz (Fig 5C;  $p = 2.23 \times 10^{-6}$ ). Finally, for 52 mW CW tFUS, stimulating during periods of frequent  
339 SWR led to a significant increase in firing rate relative to rare SWR (Fig 5D: frequent:  $0.54 \pm 0.099$   
340 Hz, rare:  $0.074 \pm 0.049$  Hz,  $p = 4.12 \times 10^{-6}$ ). The sensitivity of the tFUS effect to the prevalence  
341 of SWRs suggests that low-intensity ultrasound's modulation interacts strongly with concurrent  
342 synaptic input into the sonicated region.

343 **tFUS modulates theta and gamma power.** The LFP provides a complementary measure of  
344 neural activity, reflecting the overall synaptic activity at the recorded region. We probed changes in  
345 LFP power during and after sonication. Consistent with the findings of the MUA analysis, significant  
346 changes were resolved in the 13 mW AM tFUS and 52 mW CW tFUS conditions. In particular, a  
347 significant increase of gamma power was observed during 13 mW AM tFUS (Fig 6A, significant  
348 cluster from 63-94 Hz,  $p < 0.05$ , permutation test, cluster corrected for multiple comparisons). An



349 increase in both theta and gamma bands was observed during and also after 52 mW CW tFUS (Fig  
350 6D, significant clusters at 8-18, 81-90, 105-145, 159-193, 203-215, 224-229 Hz). No significant  
351 LFP power changes were resolved at 13 mW CW or 52 mW AM tFUS (Fig 6B-C).

## 352 **Discussion**

353 Neuromodulation techniques capable of directly evoking neuronal firing are referred to as “super-  
354 threshold”. Examples of these are transcranial magnetic stimulation, deep brain stimulation, and  
355 optogenetics. On the other hand, sub-threshold techniques such as transcranial direct current  
356 stimulation (tDCS) do not directly evoke firing but rather bring the membrane potential closer to (or  
357 further from) the threshold for action potential initiation. Our findings suggest that, at the intensities  
358 tested here (13 - 52 mW/ cm<sup>2</sup>), tFUS belongs to the subthreshold category. We found no evidence  
359 of time-locked firing, and the largest changes in firing rate were observed during the second minute  
360 of a three-minute sonication, implying an accumulating effect. Moreover, the large influence of  
361 pre-stimulation LFP oscillations and SWRs on the resulting neuromodulation outcome suggest that  
362 concurrent synaptic input is a key ingredient of successful neuromodulation. LFP power reflects  
363 the amount of coherent synaptic input into the region (48), while SWRs are highly synchronous  
364 events marked by coordinated firing across many neurons (42). Notably, SWRs are associated with  
365 a transient increase in hippocampal excitability (49), consistent with our finding of an enhanced  
366 response to tFUS during periods of frequent SWR. Both AM tFUS, which reduced firing, and CW  
367 tFUS, which increased it, led to significantly larger effects on spiking in the presence of strong LFP  
368 rhythms and frequent SWRs. The term “gating” denotes that without a sufficient level of synaptic  
369 drive into the stimulated cell, tFUS may not produce a change in spiking rate. Motivated by similar  
370 hypotheses in electrical stimulation, one approach that has been employed in tDCS is to pair the

## Oscillations gate tFUS outcomes

---

371 stimulation with a task that engages the stimulated area (50). Future tFUS studies that combine  
372 behavioral interventions with stimulation may further clarify the role of concurrent input on neural  
373 outcomes. Note that in contrast to what was found here, earlier investigations of tFUS reported very  
374 short latency responses (8) that are more consistent with a super-threshold mechanism, and these  
375 have been attributed by some as being influenced by an auditory confound (12; 13). Furthermore, it  
376 is possible that at higher acoustic intensities, the effect of tFUS may become super-threshold, and in  
377 particular in the event that a local temperature increase is produced at the sonicated region.

378         The majority of recent tFUS investigations have employed brief sonications, typically in the  
379 tens to hundreds of milliseconds (2), with stimulation applied between relatively long intertrial  
380 intervals. An advantage of this approach is that it affords an increase in statistical power, as the  
381 evoked response may be time locked and averaged over many repeated trials. Nevertheless, previous  
382 investigations that have instead employed single sonications with long duration have reported  
383 outlasting effects. For example, 40 seconds of tFUS to the primate brain was found to produce a  
384 long-lasting effect on functional connectivity (16). A 20-minute application of tFUS in the rat was  
385 shown to shorten the time required to recover from ketamine-xylazine anesthesia (51). Three minutes  
386 of tFUS was shown to reduce epileptic discharges when applied after the onset of chemically-induced  
387 seizures (34). Similarly, here we applied 180 s of tFUS, and indeed were able to find a significant  
388 modulation beyond the sonication period. The outlasting effects were more prominent with AM  
389 tFUS, where firing rate was significantly reduced as far as four minutes into the post-sonication  
390 period. In this way, our finding supports the notion that relatively long sonication periods promote  
391 sustained neuromodulation, which will be required for future clinical investigations of low-intensity  
392 ultrasound.

393         The finding of decreased firing during and after AM tFUS at 13 mW is one of the first  
394 reports of a reduction in spiking from tFUS. The majority of prior investigations have reported that

## Oscillations gate tFUS outcomes

---

395 tFUS increases firing in cortex (37; 52), hippocampus (8; 53; 54; 55), and others (56; 6). Note  
396 that reductions in evoked potentials, which have been reported with tFUS (11; 57; 58; 59; 60; 34;  
397 61; 62; 63), do not necessarily imply a reduction in spiking. The amplitude of field potentials  
398 is strongly affected by the coherence among the recorded neurons (64), and thus it is difficult to  
399 relate changes in evoked potentials to underlying changes in firing rate. It is possible that the 40  
400 Hz AM waveform employed here activated a distinct subset of ion channels (65; 66), or a different  
401 mechanism altogether than CW tFUS, leading to a net reduction in MUA activity. The finding  
402 that the reduction was not resolved at AM tFUS with a higher intensity (although it was evident  
403 when conditioning on the prevalence of SWR, see Fig 5C) suggests a complex interaction between  
404 acoustic intensity and waveform. It has been suggested that tuning the PRF may offer specificity of  
405 the neuromodulating effect from PW tFUS (37). Our findings indicate that both the timing of the  
406 ultrasonic perturbation and its force combine to shape the subsequent response to tFUS. Further  
407 investigation is needed to better understand the interplay between intensity and temporal dynamics,  
408 and how to optimally select their values to achieve the desired neurophysiological outcome. AM  
409 tFUS may provide a complementary tool in the tFUS arsenal by allowing for a transient reduction in  
410 activity.

411 The acoustic intensities employed in our study are well below the FDA safety guidelines for  
412 ultrasonic imaging:  $720 \text{ mW/cm}^2$ . We were able to resolve firing rate changes at average intensities  
413 of only  $13 \text{ mW/cm}^2$  with AM tFUS and  $52 \text{ mW/cm}^2$  with CW tFUS. Furthermore, the mechanical  
414 index employed here ( $<0.02$ ) is also an order of magnitude lower than the 0.3 suggested to be the  
415 upper limit of diagnostic imaging. Given the excellent safety profile of low-intensity ultrasound in  
416 imaging, it is very likely that the stimulation investigated here is safe. Moreover, recent studies that  
417 have tested tFUS intensities much higher than here (up to  $25.8 \text{ W/cm}^2$ ) reported no tissue damage as  
418 assessed by histological assessment of post-mortem brain tissue (67). The fact that neuromodulation

## Oscillations gate tFUS outcomes

---

419 was observed here at such low acoustic intensities is encouraging, as it implies that testing the  
420 effects of AM tFUS in humans may be carried out at power levels that are currently used in human  
421 ultrasound imaging practice, and thus unlikely to produce tissue damage. In addition to histological  
422 evaluation, temperature measurements, especially at the skull, will further lend evidence for the  
423 safety of AM tFUS.

424         Although our study provides evidence for the distinct nature of AM stimulation compared  
425 to CW tFUS, we did not perform a comparison between AM and PW tFUS. Future studies that  
426 match the PRF and AM frequency, as well as the average acoustic intensity, are thus required in  
427 order to ascertain the effect of the smoothness and continuity of AM waveforms on ultrasonic  
428 neuromodulation outcomes. There is evidence that abrupt pressure transitions may innervate the  
429 peripheral auditory system (15), with this side effect removed when smoothing the waveform edges.  
430 Another limitation of this study is the exclusive use of anesthetized animals. The state changes  
431 inherent to sleep and anesthesia are well-suited to investigating the gating of tFUS effects by baseline  
432 brain activity. Nevertheless, future studies are needed to understand the role of endogenous rhythms  
433 in the awake state on neuronal responses to focused ultrasound.

## 434 **References**

- 435 [1] Fomenko, A., Neudorfer, C., Dallapiazza, R. F., Kalia, S. K. & Lozano, A. M. Low-  
436 intensity ultrasound neuromodulation: An overview of mechanisms and emerging human  
437 applications. *Brain Stimul.* **11**, 1209–1217 (2018).
- 438 [2] Naor, O., Krupa, S. & Shoham, S. Ultrasonic neuromodulation. *J. Neural Eng.* **13**, 031003  
439 (2016).
- 440 [3] Fini, M. & Tyler, W. J. Transcranial focused ultrasound: a new tool for non-invasive neuro-  
441 modulation. *Int. Rev. Psychiatry* **29**, 168–177 (2017).
- 442 [4] Blackmore, J., Shrivastava, S., Sallet, J., Butler, C. R. & Cleveland, R. O. Ultrasound  
443 neuromodulation: A review of results, mechanisms and safety. *Ultrasound Med. Biol.* **45**,  
444 1509–1536 (2019).
- 445 [5] Harvey, E. N. & Newton Harvey, E. THE EFFECT OF HIGH FREQUENCY SOUND WAVES  
446 ON HEART MUSCLE AND OTHER IRRITABLE TISSUES (1929).
- 447 [6] Tyler, W. J. *et al.* Remote excitation of neuronal circuits using low-intensity, low-frequency  
448 ultrasound. *PLoS One* **3**, e3511 (2008).
- 449 [7] Muratore, R. *et al.* Bioeffective ultrasound at very low doses: Reversible manipulation of  
450 neuronal cell morphology and function in vitro (2009).
- 451 [8] Tufail, Y. *et al.* Transcranial pulsed ultrasound stimulates intact brain circuits. *Neuron* **66**,  
452 681–694 (2010).
- 453 [9] Lee, W. *et al.* Transcranial focused ultrasound stimulation of motor cortical areas in freely-  
454 moving awake rats (2018).
- 455 [10] Yoo, S.-S. *et al.* Focused ultrasound brain stimulation to anesthetized rats induces long-term  
456 changes in somatosensory evoked potentials (2018).
- 457 [11] Kim, H. *et al.* Suppression of EEG visual-evoked potentials in rats through neuromodulatory  
458 focused ultrasound (2015).
- 459 [12] Sato, T., Shapiro, M. G. & Tsao, D. Y. Ultrasonic neuromodulation causes widespread cortical  
460 activation via an indirect auditory mechanism. *Neuron* **98**, 1031–1041.e5 (2018).
- 461 [13] Guo, H. *et al.* Ultrasound produces extensive brain activation via a cochlear pathway (2018).
- 462 [14] Darrow, D. P., O’Brien, P., Richner, T. J., Netoff, T. I. & Ebbini, E. S. Reversible neuroinhibition  
463 by focused ultrasound is mediated by a thermal mechanism. *Brain Stimul.* **12**, 1439–1447  
464 (2019).
- 465 [15] Mohammadjavadi, M. *et al.* Elimination of peripheral auditory pathway activation does not  
466 affect motor responses from ultrasound neuromodulation (2019).

- 467 [16] Verhagen, L. *et al.* Offline impact of transcranial focused ultrasound on cortical activation in  
468 primates. *Elife* **8** (2019).
- 469 [17] Wattiez, N. *et al.* Transcranial ultrasonic stimulation modulates single-neuron discharge in  
470 macaques performing an antisaccade task. *Brain Stimul.* **10**, 1024–1031 (2017).
- 471 [18] Constans, C., Deffieux, T., Pouget, P., Tanter, M. & Aubry, J.-F. A 200–1380-khz quadrifre-  
472 quency focused ultrasound transducer for neurostimulation in rodents and primates:  
473 Transcranial in vitro calibration and numerical study of the influence of skull cavity (2017).
- 474 [19] Deffieux, T. *et al.* Transcranial ultrasound neuromodulation of the contralateral visual field in  
475 awake monkey (2013).
- 476 [20] Deffieux, T. *et al.* Low intensity focused ultrasound modulates monkey visuomotor behavior  
477 (2015).
- 478 [21] Legon, W., Ai, L., Bansal, P. & Mueller, J. K. Neuromodulation with single-element transcranial  
479 focused ultrasound in human thalamus. *Hum. Brain Mapp.* **39**, 1995–2006 (2018).
- 480 [22] Legon, W. *et al.* Transcranial focused ultrasound modulates the activity of primary somatosen-  
481 sory cortex in humans. *Nat. Neurosci.* **17**, 322–329 (2014).
- 482 [23] Legon, W., Bansal, P., Tyshynsky, R., Ai, L. & Mueller, J. K. Transcranial focused ultrasound  
483 neuromodulation of the human primary motor cortex. *Sci. Rep.* **8**, 10007 (2018).
- 484 [24] Lee, W., Chung, Y. A., Jung, Y., Song, I.-U. & Yoo, S.-S. Simultaneous acoustic stimulation  
485 of human primary and secondary somatosensory cortices using transcranial focused  
486 ultrasound. *BMC Neurosci.* **17**, 68 (2016).
- 487 [25] Panczykowski, D. M., Monaco, E. A. & Friedlander, R. M. Transcranial focused ultrasound  
488 modulates the activity of primary somatosensory cortex in humans (2014).
- 489 [26] Mueller, J., Legon, W., Opitz, A., Sato, T. F. & Tyler, W. J. Transcranial focused ultrasound  
490 modulates intrinsic and evoked EEG dynamics. *Brain Stimul.* **7**, 900–908 (2014).
- 491 [27] Ai, L., Bansal, P., Mueller, J. K. & Legon, W. Effects of transcranial focused ultrasound on  
492 human primary motor cortex using 7T fMRI.
- 493 [28] Leo Ai, Mueller, J. K., Grant, A., Eryaman, Y. & Wynn Legon. Transcranial focused ultrasound  
494 for BOLD fMRI signal modulation in humans. *Conf. Proc. IEEE Eng. Med. Biol. Soc.*  
495 **2016**, 1758–1761 (2016).
- 496 [29] Lee, W. *et al.* Transcranial focused ultrasound stimulation of human primary visual cortex. *Sci.*  
497 *Rep.* **6**, 34026 (2016).
- 498 [30] Lee, W. *et al.* Image-guided transcranial focused ultrasound stimulates human primary  
499 somatosensory cortex. *Sci. Rep.* **5**, 8743 (2015).
- 500 [31] Clement, G. T. & Hynynen, K. A non-invasive method for focusing ultrasound through the  
501 human skull. *Phys. Med. Biol.* **47**, 1219–1236 (2002).

- 502 [32] Uhlhaas, P. J. & Singer, W. Neuronal dynamics and neuropsychiatric disorders: Toward a  
503 translational paradigm for dysfunctional Large-Scale networks (2012).
- 504 [33] O'Brien, W. D. Ultrasound–biophysics mechanisms (2007).
- 505 [34] Min, B.-K. *et al.* Focused ultrasound-mediated suppression of chemically-induced acute  
506 epileptic EEG activity. *BMC Neurosci.* **12**, 23 (2011).
- 507 [35] Kim, H., Chiu, A., Lee, S. D., Fischer, K. & Yoo, S.-S. Focused ultrasound-mediated non-  
508 invasive brain stimulation: examination of sonication parameters. *Brain Stimul.* **7**, 748–756  
509 (2014).
- 510 [36] King, R. L., Brown, J. R., Newsome, W. T. & Pauly, K. B. Effective parameters for ultrasound-  
511 induced in vivo neurostimulation. *Ultrasound Med. Biol.* **39**, 312–331 (2013).
- 512 [37] Yu, K., Niu, X., Krook-Magnuson, E. & He, B. Intrinsic functional neuron-type selectivity of  
513 transcranial focused ultrasound neuromodulation. *Nat. Commun.* **12**, 2519 (2021).
- 514 [38] López-Alonso, V., Cheeran, B., Río-Rodríguez, D. & Fernández-Del-Olmo, M. Inter-individual  
515 variability in response to non-invasive brain stimulation paradigms. *Brain Stimul.* **7**, 372–  
516 380 (2014).
- 517 [39] Guerra, A., López-Alonso, V., Cheeran, B. & Suppa, A. Variability in non-invasive brain  
518 stimulation studies: Reasons and results. *Neurosci. Lett.* **719**, 133330 (2020).
- 519 [40] Guerra, A., López-Alonso, V., Cheeran, B. & Suppa, A. Solutions for managing variability in  
520 non-invasive brain stimulation studies. *Neurosci. Lett.* **719**, 133332 (2020).
- 521 [41] Romei, V., Gross, J. & Thut, G. On the role of prestimulus alpha rhythms over Occipito-Parietal  
522 areas in visual input regulation: Correlation or causation? (2010).
- 523 [42] Buzsáki, G. Hippocampal sharp wave-ripple: A cognitive biomarker for episodic memory and  
524 planning. *Hippocampus* **25**, 1073–1188 (2015).
- 525 [43] Pachitariu, M., Steinmetz, N. A., Kadir, S. N., Carandini, M. & Harris, K. D. Fast and accurate  
526 spike sorting of high-channel count probes with KiloSort. In Lee, D., Sugiyama, M.,  
527 Luxburg, U., Guyon, I. & Garnett, R. (eds.) *Advances in Neural Information Processing*  
528 *Systems*, vol. 29 (Curran Associates, Inc., 2016).
- 529 [44] Rossant, C. & Harris, K. D. Hardware-accelerated interactive data visualization for neuroscience  
530 in python. *Front. Neuroinform.* **7**, 36 (2013).
- 531 [45] Candès, E. J., Li, X., Ma, Y. & Wright, J. Robust principal component analysis? *Journal of the*  
532 *ACM (JACM)* **58**, 1–37 (2011).
- 533 [46] Levenstein, D., Buzsáki, G. & Rinzel, J. NREM sleep in the rodent neocortex and hippocampus  
534 reflects excitable dynamics. *Nat. Commun.* **10**, 2478 (2019).



- 535 [47] Smith, S. M. & Nichols, T. E. Threshold-free cluster enhancement: addressing problems of  
536 smoothing, threshold dependence and localisation in cluster inference. *Neuroimage* **44**,  
537 83–98 (2009).
- 538 [48] Buzsáki, G., Anastassiou, C. A. & Koch, C. The origin of extracellular fields and currents—EEG,  
539 ECoG, LFP and spikes. *Nat. Rev. Neurosci.* **13**, 407–420 (2012).
- 540 [49] Chrobak, J. J. & Buzsáki, G. Selective activation of deep layer (V-VI) retrohippocampal cortical  
541 neurons during hippocampal sharp waves in the behaving rat. *J. Neurosci.* **14**, 6160–6170  
542 (1994).
- 543 [50] Gill, J., Shah-Basak, P. P. & Hamilton, R. It’s the thought that counts: Examining the  
544 Task-Dependent effects of transcranial direct current stimulation on executive function  
545 (2017).
- 546 [51] Yoo, S.-S., Kim, H., Min, B.-K., Franck, E. & Park, S. Transcranial focused ultrasound to the  
547 thalamus alters anesthesia time in rats. *Neuroreport* **22**, 783–787 (2011).
- 548 [52] Moore, M. E., Loft, J. M., Clegern, W. C. & Wisor, J. P. Manipulating neuronal activity in the  
549 mouse brain with ultrasound: A comparison with optogenetic activation of the cerebral  
550 cortex. *Neurosci. Lett.* **604**, 183–187 (2015).
- 551 [53] Kim, H.-B. *et al.* Prolonged stimulation with low-intensity ultrasound induces delayed increases  
552 in spontaneous hippocampal culture spiking activity (2017).
- 553 [54] Khraiche, M. L., Phillips, W. B., Jackson, N. & Muthuswamy, J. Ultrasound induced increase  
554 in excitability of single neurons. *Conf. Proc. IEEE Eng. Med. Biol. Soc.* **2008**, 4246–4249  
555 (2008).
- 556 [55] Choi, J. B. *et al.* The effect of focused ultrasonic stimulation on the activity of hippocampal  
557 neurons in multi-channel electrode. In *2013 6th International IEEE/EMBS Conference on*  
558 *Neural Engineering (NER)*, 731–734 (2013).
- 559 [56] Clennell, B. *et al.* Transient ultrasound stimulation has lasting effects on neuronal excitability.  
560 *Brain Stimul.* **14**, 217–225 (2021).
- 561 [57] Yoo, S.-S. *et al.* Focused ultrasound modulates region-specific brain activity. *Neuroimage* **56**,  
562 1267–1275 (2011).
- 563 [58] Fry, F. J., Ades, H. W. & Fry, W. J. Production of reversible changes in the central nervous  
564 system by ultrasound. *Science* **127**, 83–84 (1958).
- 565 [59] Daniels, D. *et al.* Focused Ultrasound-Induced suppression of auditory evoked potentials in  
566 vivo. *Ultrasound Med. Biol.* **44**, 1022–1030 (2018).
- 567 [60] Darvas, F., Mehić, E., Caler, C. J., Ojemann, J. G. & Mourad, P. D. Toward deep brain monitoring  
568 with superficial EEG sensors plus neuromodulatory focused ultrasound. *Ultrasound Med.*  
569 *Biol.* **42**, 1834–1847 (2016).



- 570 [61] Rinaldi, P. C., Jones, J. P., Reines, F. & Price, L. R. Modification by focused ultrasound pulses  
571 of electrically evoked responses from an in vitro hippocampal preparation (1991).
- 572 [62] Dallapiazza, R. F. *et al.* Noninvasive neuromodulation and thalamic mapping with low-intensity  
573 focused ultrasound. *J. Neurosurg.* **128**, 875–884 (2018).
- 574 [63] Bachtold, M. R., Rinaldi, P. C., Jones, J. P., Reines, F. & Price, L. R. Focused ultrasound  
575 modifications of neural circuit activity in a mammalian brain (1998).
- 576 [64] Musall, S., von Pförtl, V., Rauch, A., Logothetis, N. K. & Whittingstall, K. Effects of neural  
577 synchrony on surface EEG. *Cereb. Cortex* **24**, 1045–1053 (2014).
- 578 [65] Kubanek, J. *et al.* Ultrasound modulates ion channel currents. *Sci. Rep.* **6**, 24170 (2016).
- 579 [66] Kubanek, J., Shukla, P., Das, A., Baccus, S. A. & Goodman, M. B. Ultrasound elicits behavioral  
580 responses through mechanical effects on neurons and ion channels in a simple nervous  
581 system. *J. Neurosci.* **38**, 3081–3091 (2018).
- 582 [67] Gaur, P. *et al.* Histologic safety of transcranial focused ultrasound neuromodulation and  
583 magnetic resonance acoustic radiation force imaging in rhesus macaques and sheep. *Brain*  
584 *Stimul.* **13**, 804–814 (2020).

585 **Figures**

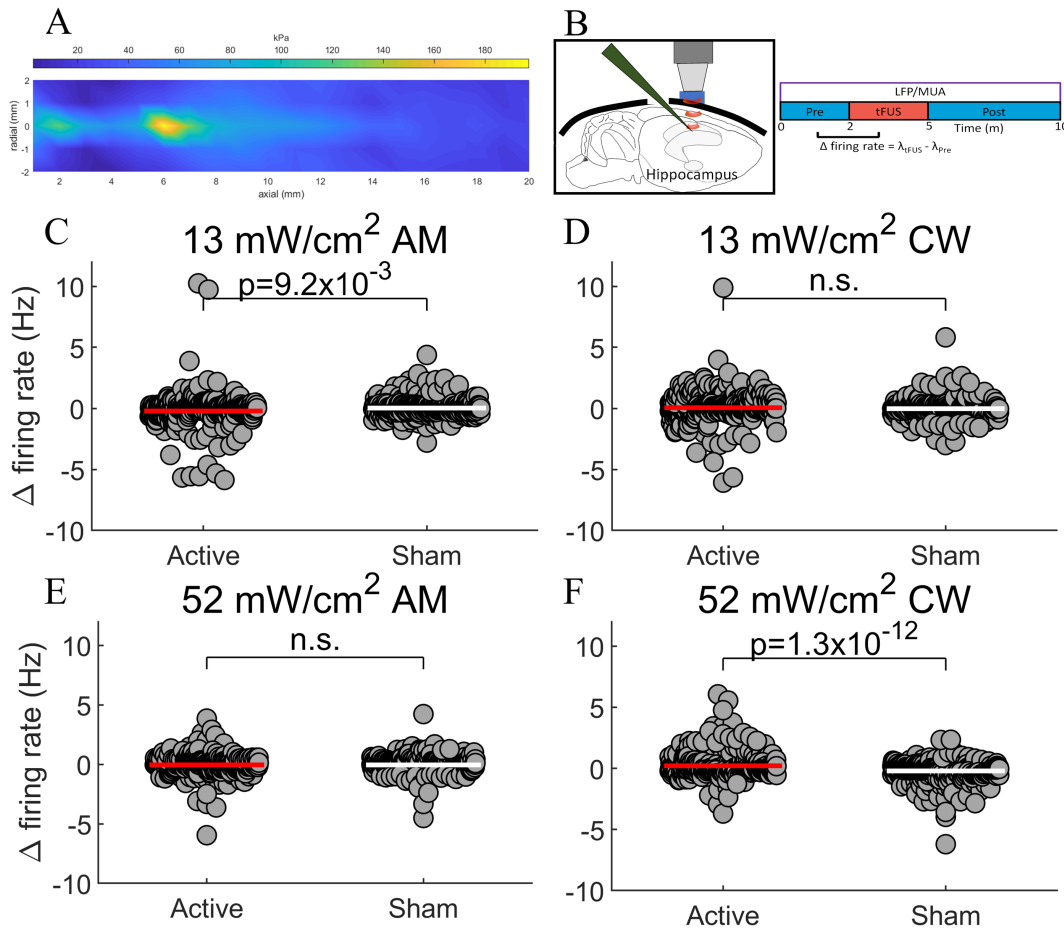

**Figure 1: AM and CW tFUS produce opposing effects on firing rate.** (A) The empirical beampattern of a transducer employed during the experiments, where the lateral and axial resolution are 1 and 1.5 mm, respectively. (B) Multi-unit activity (MUA) was captured from the hippocampus concurrently to AM and CW tFUS. We measured the change in firing rate observed during sonication relative to the preceding two minutes. (C) Compared to sham stimulation, 13 mW/cm<sup>2</sup> AM tFUS significantly reduced firing rate ( $p = 0.0093$ ,  $n = 392$ , t-test). No change in firing rate was resolved during stimulation with (D) 13 mW/cm<sup>2</sup> CW or (E) 52 mW/cm<sup>2</sup> AM tFUS. (F) On the other hand, a significant firing rate increase was found during 52 mW/cm<sup>2</sup> CW tFUS ( $p = 1.3 \times 10^{-12}$ ). The magnitude of both the reduction by AM and increase by CW was approximately 0.2 Hz, representing 10% of the baseline rate. These findings suggest that AM and CW tFUS yield distinct neuronal outcomes, and imply a complex interaction between ultrasonic intensity and waveform.

Oscillations gate tFUS outcomes

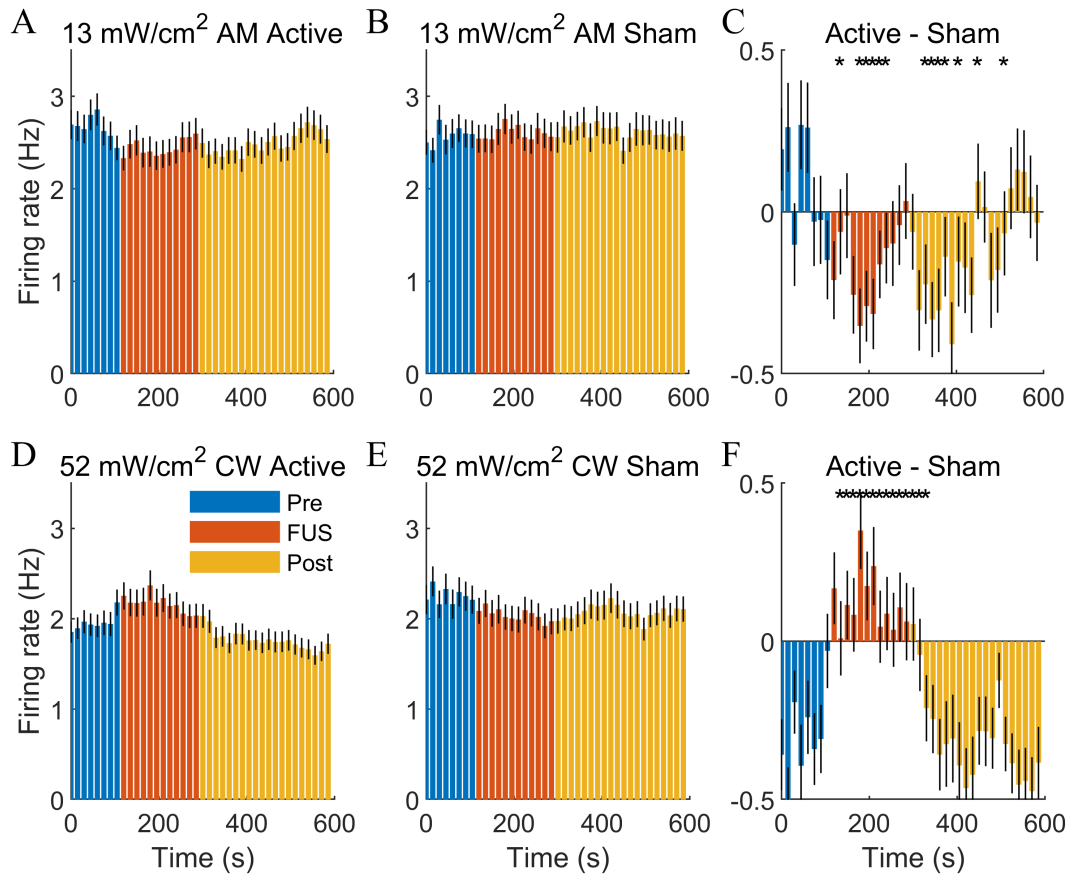

**Figure 2: The time course of firing rate modulation suggests an accumulating effect.** (A) Vertical axis depicts the mean firing rate in non-overlapping 15-second windows spanning the 10-minute recording period of the 13 mW/cm<sup>2</sup> AM tFUS condition (baseline: green, stimulation: red, post-stimulation: orange). A reduction during and immediately after sonication is apparent in several time windows. (B) Time course of firing rate for sham AM tFUS. (C) The difference in firing rate between active and sham stimulation shows that the maximal reduction occurs during the second minute of sonication (i.e., 180 - 195 s into the recording), and is sustained for more than three minutes after sonication (i.e., 510 s). Asterisks denote a significant change relative to sham for the time window (during tFUS:  $p < 0.016$ , after tFUS:  $p < 0.013$ , t-test,  $n = 392$ , corrected for multiple comparisons by controlling the false discovery rate at 0.05). (D) Same as (A) but now for 52 mW/cm<sup>2</sup> CW tFUS. Firing rate is increased during the stimulation period. (E) Same as D but now for sham stimulation. (F) The difference in firing rate between active and sham stimulation, where the peak effect is again observed 180-195 s into the recording. Unlike AM tFUS, significant changes in firing rate were mostly confined to the sonication period (during tFUS:  $p < 1.8 \times 10^{-4}$ , after tFUS:  $p < 0.0055$ ).

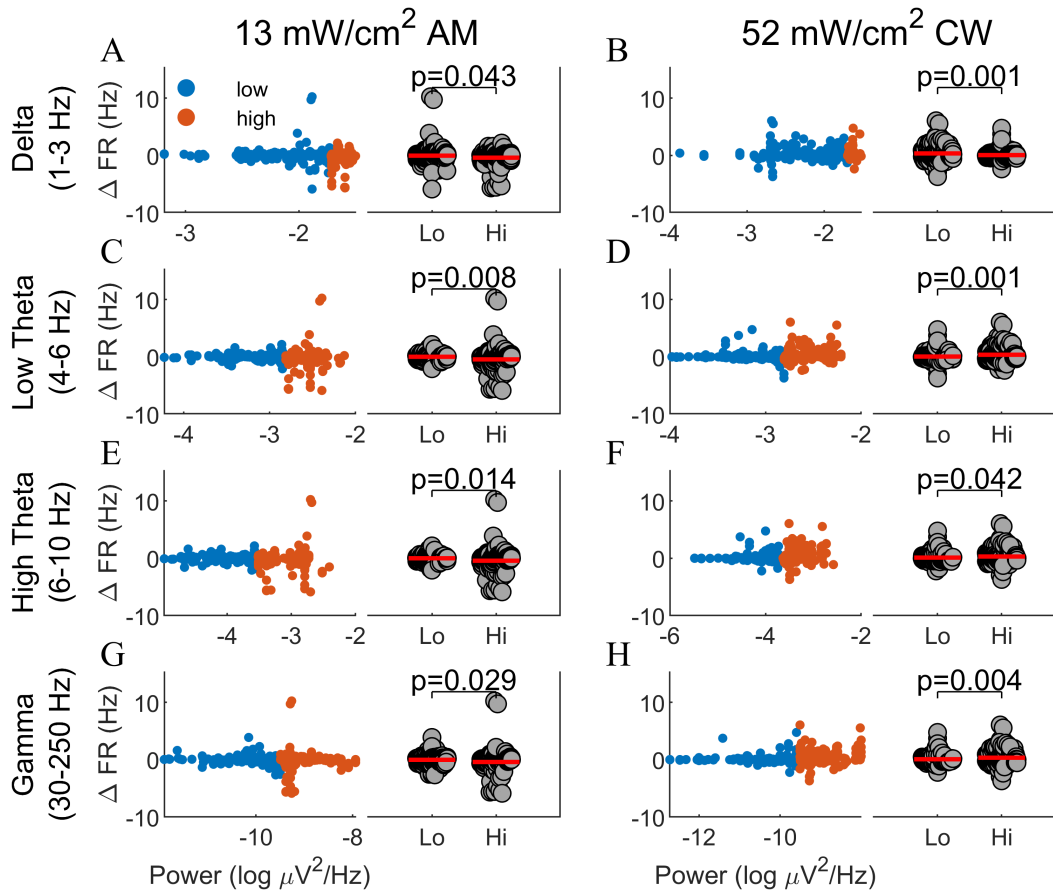

**Figure 3: Firing rate changes are gated by pre-stimulation LFP power.** In order to test the hypothesis that the brain state leading up to sonication influences the subsequent response to tFUS, we measured baseline LFP power in the delta (1-3 Hz), low theta (4-6 Hz), high theta (6-10 Hz), and gamma (30-250 Hz) frequency bands. For each frequency band, units were then partitioned into two groups: those whose baseline power was less than the median (blue) and those whose power fell above the median (red). **(A)** The firing rate induced by AM tFUS was significantly stronger when preceded by relatively high delta power ( $p = 0.043$ ,  $n = 196$ , t-test, corrected for 8 comparisons by controlling the FDR at 0.05). **(B)** Conversely, the increase in firing rate due to CW tFUS was significantly larger when preceded by *low* delta power ( $p = 0.001$ ). **(C-D)** For both AM and CW, the magnitude of the firing rate change was significantly larger when the period leading up to sonication was marked by higher power in the 4-6 Hz theta band (AM:  $p = 0.008$ , CW:  $p = 0.001$ ). **(E-F)** Same as (C-D) but now for the 6-10 Hz portion of the theta band. The firing rate reductions and increases from AM and CW tFUS, respectively, were larger when preceded by higher baseline 6-10 Hz power (AM:  $p = 0.014$ , CW:  $p = 0.042$ ). **(G-H)**. The power of gamma band (30-250 Hz) oscillations similarly predicted the size of the firing rate change for both AM ( $p = 0.029$ ) and CW tFUS ( $p = 0.004$ ). Thus, in all conditions, the strength of pre-stimulation rhythms was predictive of the subsequent change in spiking from tFUS.

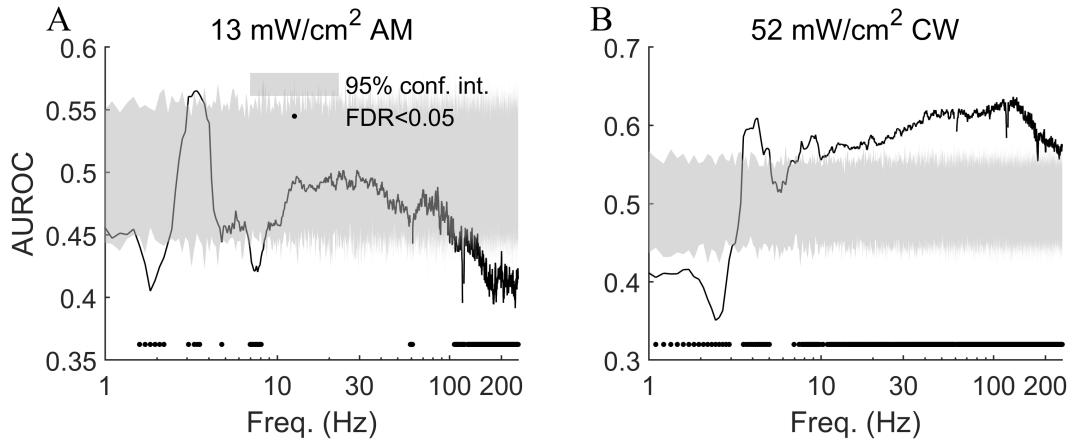

**Figure 4: The power of pre-stimulation gamma oscillations is predictive of neuronal response to tFUS.** In order to identify the LFP frequencies most predictive of neuromodulation outcome, we performed linear discriminant analysis aimed at classifying “responders” (units showing a firing rate change greater than the median) from “non-responders” (units whose firing rate changed less than the median) from the baseline LFP power at a given frequency (horizontal axes). The Area under the Receiver Operating Characteristic curve (AUROC, vertical axes) is a measure of the separation between distributions of baseline LFP power for responders versus non-responders. **(A)** For AM tFUS, we found significant discrimination in punctate regions of the delta and theta regions, and an extensive region of significant discrimination in the 100 - 250 Hz gamma region. The shaded grey region indicates the 95% confidence interval for AUROC under the null hypothesis. Due to AM stimulation reducing firing rate, AUROC values less than 0.5 denote that high values of gamma power led to more negative changes (i.e., a stronger neuromodulation). **(B)** For CW tFUS, low values of delta power (1 - 3 Hz) and high values of both theta and especially gamma (30 - 250 Hz) power led to a greater increase in firing rate during tFUS. These findings indicate that baseline gamma band activity is a strong predictor of neuronal sensitivity to ultrasonic neuromodulation.

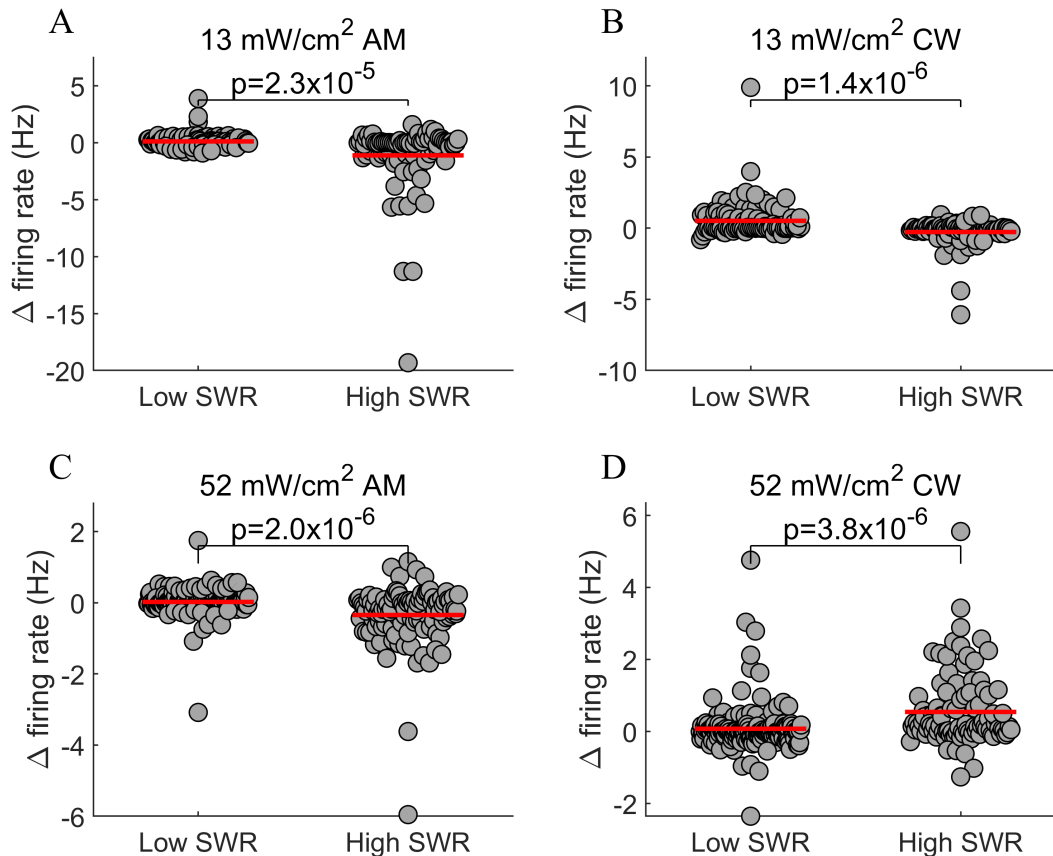

**Figure 5: The prevalence of SWR in the pre-stimulation period is a strong driver of neuro-modulation outcome.** Sharp-wave ripples (SWR) in the hippocampal LFP reflect a transient state of increased neural excitability. To test whether neuronal sensitivity to tFUS is modulated by the prevalence of SWR leading up to sonication, units were partitioned into two groups depending on the amount of SWR during the baseline period (i.e., median split). **(A)** Stimulation with 13 mW AM tFUS produced a significantly larger reduction in firing rate (i.e., 33%) when applied during frequent SWR ( $p = 2.58 \times 10^{-5}$ ,  $n_{\text{low}} = 169$ ,  $n_{\text{high}} = 101$ , t-test). **(B)** The prevalence of baseline SWR also modulated the change in firing rate observed with 13 mW CW tFUS ( $p = 1.52 \times 10^{-6}$ ). **(C)** Firing rate reductions during 52 mW AM tFUS were significantly larger in units with frequent SWR ( $p = 2.23 \times 10^{-6}$ ). **(D)** Units with more frequent SWR also exhibited a larger increase in firing due to 52 mW CW tFUS ( $p = 4.12 \times 10^{-6}$ ). These findings suggest that the success of tFUS is linked to the presence of concurrent synaptic input at the sonicated region.

Oscillations gate tFUS outcomes

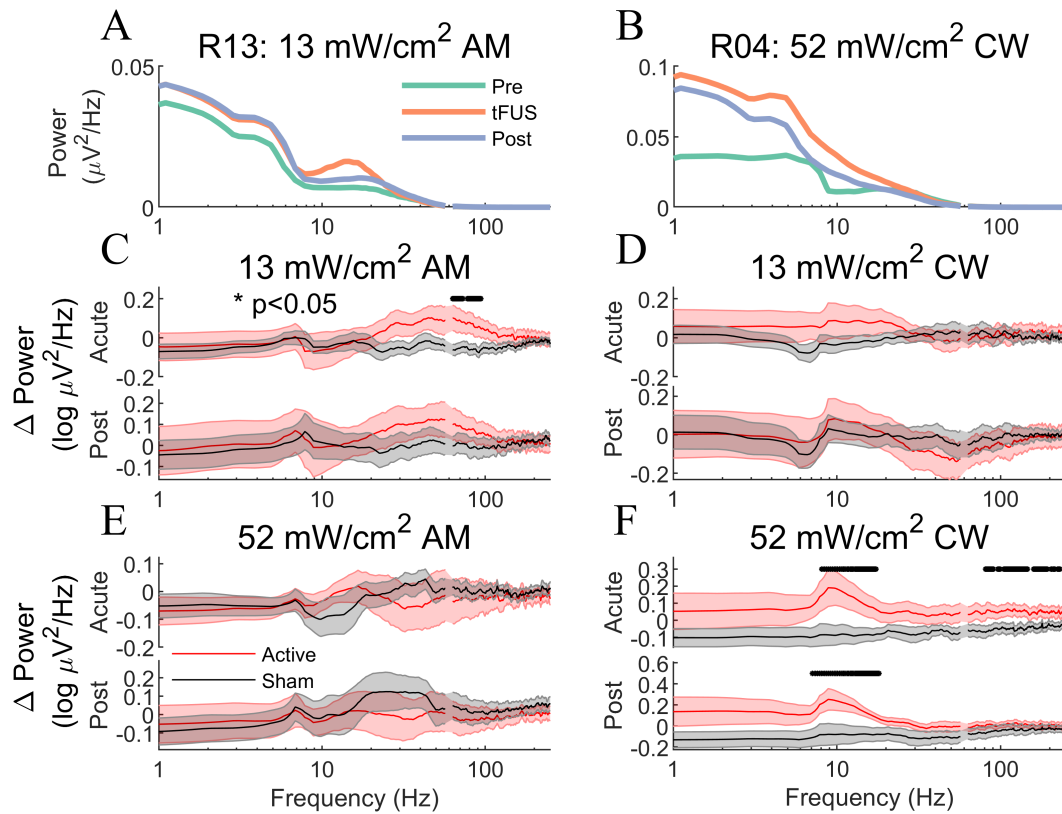

**Figure 6: tFUS modulates LFP power in the theta and gamma bands.** To determine whether tFUS modulates overall levels of synaptic activity, we probed changes in LFP power during and after sonication. **(A)** LFP power spectrum before, during, and after 13 mW/cm<sup>2</sup> AM tFUS for a sample animal. **(B)** Same as **(A)** but now for a sample animal at 52 mW/cm<sup>2</sup> CW tFUS. **(C)** At the group level, 13 mW/cm<sup>2</sup> AM tFUS significantly increased power in a cluster of gamma band frequencies (63-94 Hz,  $p < 0.05$ ,  $n = 18$ , permutation test, cluster corrected for multiple comparisons). The increased gamma power was not sustained following sonication. Mirroring the MUA findings, no significant LFP power changes were detected for either **(D)** 13 mW/cm<sup>2</sup> CW or **(E)** 52 mW/cm<sup>2</sup> AM tFUS. **(F)** On the other hand, a significant increase in both theta (8-18 Hz) and high gamma (80-229 Hz) was identified during 52 mW/cm<sup>2</sup> CW tFUS ( $p < 0.05$ ), with the theta band increase persisting beyond the stimulation period.
